# Supplementary material for: Plant-soil feedbacks help explain biodiversity-productivity relationships
Source: PubMed Central journal article supplement (PMC8233354; doi:10.1038/s42003-021-02329-1), 2021-06-25
Supplement: 42003_2021_2329_MOESM5_ESM.pdf [file 42003_2021_2329_MOESM5_ESM.pdf]

Corresponding author(s):

---

Last updated by author(s):

YYYY-MM-DD

---

## Reporting Summary

Nature Research wishes to improve the reproducibility of the work that we publish. This form provides structure for consistency and transparency in reporting. For further information on Nature Research policies, see our [Editorial Policies](#) and the [Editorial Policy Checklist](#).

### Statistics

For all statistical analyses, confirm that the following items are present in the figure legend, table legend, main text, or Methods section.

n/a Confirmed

- The exact sample size ( $n$ ) for each experimental group/condition, given as a discrete number and unit of measurement
- A statement on whether measurements were taken from distinct samples or whether the same sample was measured repeatedly
- The statistical test(s) used AND whether they are one- or two-sided  
*Only common tests should be described solely by name; describe more complex techniques in the Methods section.*
- A description of all covariates tested
- A description of any assumptions or corrections, such as tests of normality and adjustment for multiple comparisons
- A full description of the statistical parameters including central tendency (e.g. means) or other basic estimates (e.g. regression coefficient) AND variation (e.g. standard deviation) or associated estimates of uncertainty (e.g. confidence intervals)
- For null hypothesis testing, the test statistic (e.g.  $F$ ,  $t$ ,  $r$ ) with confidence intervals, effect sizes, degrees of freedom and  $P$  value noted  
*Give  $P$  values as exact values whenever suitable.*
- For Bayesian analysis, information on the choice of priors and Markov chain Monte Carlo settings
- For hierarchical and complex designs, identification of the appropriate level for tests and full reporting of outcomes
- Estimates of effect sizes (e.g. Cohen's  $d$ , Pearson's  $r$ ), indicating how they were calculated

*Our web collection on [statistics for biologists](#) contains articles on many of the points above.*

### Software and code

Policy information about [availability of computer code](#)

Data collection

Data analysis

For manuscripts utilizing custom algorithms or software that are central to the research but not yet described in published literature, software must be made available to editors and reviewers. We strongly encourage code deposition in a community repository (e.g. GitHub). See the Nature Research [guidelines for submitting code & software](#) for further information.

### Data

Policy information about [availability of data](#)

All manuscripts must include a [data availability statement](#). This statement should provide the following information, where applicable:

- Accession codes, unique identifiers, or web links for publicly available datasets
- A list of figures that have associated raw data
- A description of any restrictions on data availability

### Field-specific reporting

# Ecological, evolutionary & environmental sciences study design

---

All studies must disclose on these points even when the disclosure is negative.

Study description

A paired diversity-productivity experiment and two-phase plant-soil feedback experiment

## Research sample

## Plant-soil feedback experiment

Each Phase I conditioned soil type had between five and nine 'control' plots, between 27 and 30 'self' plots, and between five and nine 'other' plots per Phase II species for a total of between 75 and 135 'other' plots. 112 plots that did not have seeded species growth in Phase I, i.e. Phase I control treatment, were seeded with either one of the sixteen target species (N = 96) or left unseeded (N = 16).

Phase I Phase II N

Amorpha canescens Control 5  
 Amorpha canescens Self 34  
 Amorpha canescens Other 120  
 Andropogon gerardii Control 5  
 Andropogon gerardii Self 30  
 Andropogon gerardii Other 135  
 Achillea millefolium Control 5  
 Achillea millefolium Self 30  
 Achillea millefolium Other 135  
 Unplanted Unconditioned 16  
 Unplanted Conditioned 96  
 Dalea purpurea Control 5  
 Dalea purpurea Self 30  
 Dalea purpurea Other 135  
 Elymus canadensis Control 5  
 Elymus canadensis Self 30  
 Elymus canadensis Other 135  
 Koeleria macrantha Control 5  
 Koeleria macrantha Self 30  
 Koeleria macrantha Other 135  
 Liatris aspera Control 5  
 Liatris aspera Self 34  
 Liatris aspera Other 120  
 Lespedeza capitata Control 5  
 Lespedeza capitata Self 30  
 Lespedeza capitata Other 135  
 Lupinus perennis Control 5  
 Lupinus perennis Self 30  
 Lupinus perennis Other 120  
 Monarda fistulosa Control 5  
 Monarda fistulosa Self 34  
 Monarda fistulosa Other 120  
 Poa pratensis Control 5  
 Poa pratensis Self 28  
 Poa pratensis Other 135  
 Pascopyrum smithii Control 5  
 Pascopyrum smithii Self 31  
 Pascopyrum smithii Other 135  
 Panicum virgatum Control 5  
 Panicum virgatum Self 30  
 Panicum virgatum Other 135  
 Sorghastrum nutans Control 5  
 Sorghastrum nutans Self 30  
 Sorghastrum nutans Other 135  
 Solidago rigida Control 5  
 Solidago rigida Self 27  
 Solidago rigida Other 75  
 Schizachyrium scoparium Control 5  
 Schizachyrium scoparium Self 30  
 Schizachyrium scoparium Other 135

Diversity-Productivity experiment was a replicate of the historic E120 experiment at Cedar Creek. 63 plant communities containing 1 to 16 plant species from the above list were planted in 232 plots.

## Sampling strategy

## Plant-soil feedback experiment

Plant aboveground biomass was clipped, dried and weighed in October 2018..

## Diversity-productivity experiment

In August 2018, plant cover in each plot was assessed by visual estimation, then randomly-selected 15 cm by 150 cm strips were clipped, sorted to species, dried to constant weight at 60 °C and weighed to the nearest 0.1 g. The remaining biomass was then

|                                   |                                                                                                                                                                    |
|-----------------------------------|--------------------------------------------------------------------------------------------------------------------------------------------------------------------|
|                                   | clipped, dried and weighed. Composition from the clip strip was then used to estimate composition in the entire plot.                                              |
| Data collection                   | Plant biomass was clipped, dried, and weighed by a team led by Leslie Forero. Team members included Logan Korte, Megan Koenig, Paige Gueverra, and Cooper Johnson. |
| Timing and spatial scale          | Plant-soil feedback and diversity-productivity experiments were established in Spring of 2015 and sampled in Fall of 2018.                                         |
| Data exclusions                   | No data excluded.                                                                                                                                                  |
| Reproducibility                   | Our diversity-productivity experiment was a replicate of the historic E120 experiment at Cedar Creek.                                                              |
| Randomization                     | Plant and or community placement within the plant-soil feedback and diversity-productivity experiment was randomly assigned.                                       |
| Blinding                          | Not relevant                                                                                                                                                       |
| Did the study involve field work? | <input checked="" type="checkbox"/> Yes <input type="checkbox"/> No                                                                                                |

## Field work, collection and transport

|                        |                                                                                                                                                                                                                                                                                        |
|------------------------|----------------------------------------------------------------------------------------------------------------------------------------------------------------------------------------------------------------------------------------------------------------------------------------|
| Field conditions       | Soils are sandy and of the Nymore series: mixed, frigid, Typic Udipsamment. During the four years of the study, mean annual precipitation and temperature were 723.0 mm and 6.5° C, which is consistent with the 1963 to 2019 records at the site (769.3 mm and 6.6° C, respectively). |
| Location               | 45.403290 N, 93.187411 W                                                                                                                                                                                                                                                               |
| Access & import/export | Work performed at the Cedar Creek Ecosystem Science Reserve was done under permit and with full permission and consent of the reserve.                                                                                                                                                 |
| Disturbance            | Once the experiment was finished, we removed root barrier using a tractor and seeded the experimental area with native grasses and forbs to prevent weedy encroachment.                                                                                                                |

## Reporting for specific materials, systems and methods

We require information from authors about some types of materials, experimental systems and methods used in many studies. Here, indicate whether each material, system or method listed is relevant to your study. If you are not sure if a list item applies to your research, read the appropriate section before selecting a response.

### Materials & experimental systems

| n/a                                 | Involvement in the study                               |
|-------------------------------------|--------------------------------------------------------|
| <input checked="" type="checkbox"/> | <input type="checkbox"/> Antibodies                    |
| <input checked="" type="checkbox"/> | <input type="checkbox"/> Eukaryotic cell lines         |
| <input checked="" type="checkbox"/> | <input type="checkbox"/> Palaeontology and archaeology |
| <input checked="" type="checkbox"/> | <input type="checkbox"/> Animals and other organisms   |
| <input checked="" type="checkbox"/> | <input type="checkbox"/> Human research participants   |
| <input checked="" type="checkbox"/> | <input type="checkbox"/> Clinical data                 |
| <input checked="" type="checkbox"/> | <input type="checkbox"/> Dual use research of concern  |

### Methods

| n/a                                 | Involvement in the study                        |
|-------------------------------------|-------------------------------------------------|
| <input checked="" type="checkbox"/> | <input type="checkbox"/> ChIP-seq               |
| <input checked="" type="checkbox"/> | <input type="checkbox"/> Flow cytometry         |
| <input checked="" type="checkbox"/> | <input type="checkbox"/> MRI-based neuroimaging |
